# Supplementary material for: Facile synthesis of multiphase cobalt–iron spinel with enriched oxygen vacancies as a bifunctional oxygen electrocatalyst
Source: Royal Society of Chemistry journal article supplement (doi:10.1039/d2cp00761d), 2022-01-01
Supplement: d2cp00761d1.pdf [file d2cp00761d1.pdf]

## Supplementary Information

Facile synthesis of multiphases cobalt-iron spinel with enriched  
oxygen vacancies for bifunctional oxygen electrocatalyst

Jianan Zhang,<sup>a</sup> Luyu Ji,<sup>a</sup> Junbo Gong<sup>a</sup> and Zhao Wang<sup>\*a</sup>

## Experimental Section

**Preparation of  $\text{CoO}_x/\text{C-D}$ ,  $\text{CoO}_x/\text{C-C}$  catalysts.** The preparation of the precursor was similar to the description in the article. Specifically,  $\text{Fe}(\text{NO}_3)_3 \cdot 9\text{H}_2\text{O}$  was replaced by  $\text{Co}(\text{NO}_3)_2 \cdot 6\text{H}_2\text{O}$ , and a total of 0.004 mol  $\text{Co}(\text{NO}_3)_2 \cdot 6\text{H}_2\text{O}$  (1.16 g) was dissolved in the deionized water. And the subsequent process (the cold plasma and calcination methods) was same with the previous work. The catalysts were designed as  $\text{CoO}_x/\text{C-D}$  and  $\text{CoO}_x/\text{C-C}$ , respectively.

**Information about the cold plasma method.** Dielectric barrier discharge plasma was used in our cold plasma method. The plasma power was from Corona. lab (CTR-2000K). Before processing the samples in the reactor, made sure to put the same mass of precursor in the reactor (200 mg), which was sufficiently grinding. DBD plasma method was a gentle treatment, and the temperature in the reactor was displayed by an infrared camera, which was below 50 °C (Fig. S3).

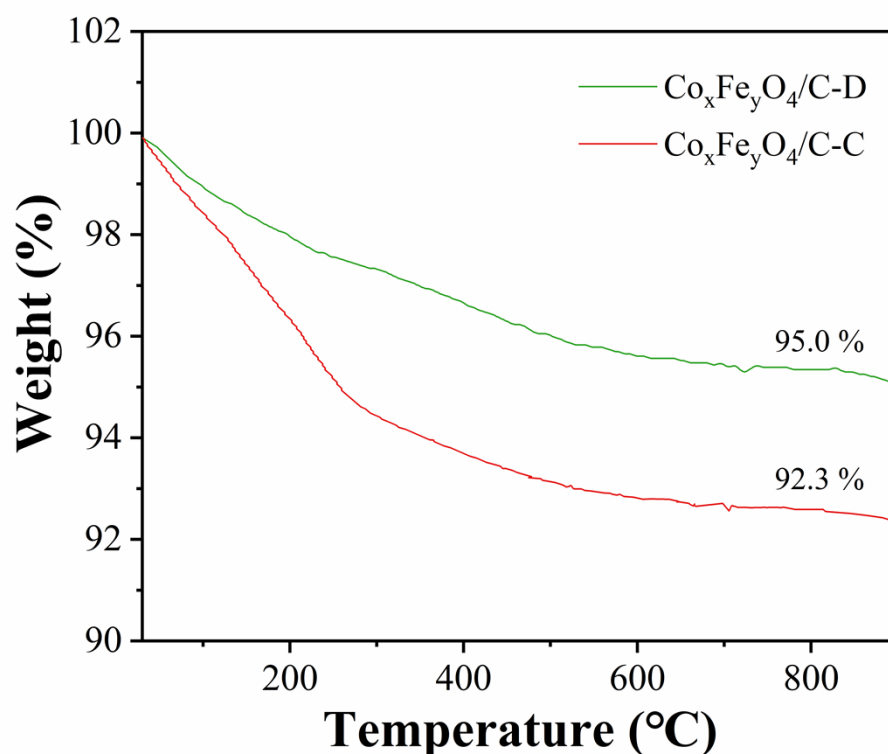

**Fig. S1** TGA curves of  $\text{Co}_x\text{Fe}_y\text{O}_4/\text{C-D}$  and  $\text{Co}_x\text{Fe}_y\text{O}_4/\text{C-C}$ .

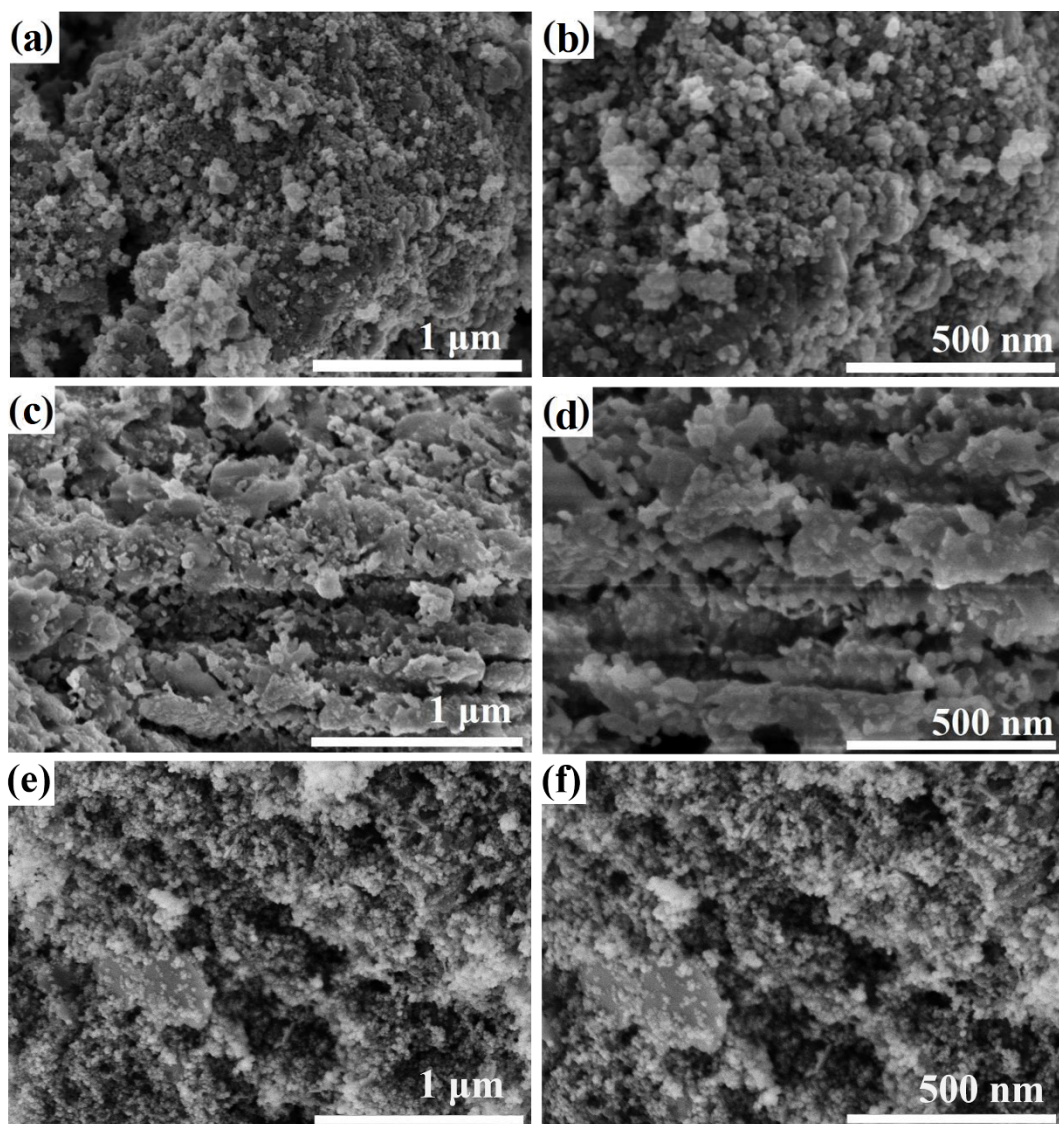

**Fig. S2** SEM images at different scales of (a, b)  $\text{Co}_x\text{Fe}_y\text{O}_4/\text{C-D}$ , (c, d)  $\text{Co}_x\text{Fe}_y\text{O}_4/\text{C-C}$ , (e, f)  $\text{Co}_x\text{Fe}_y\text{O}_4/\text{C-P}$ .

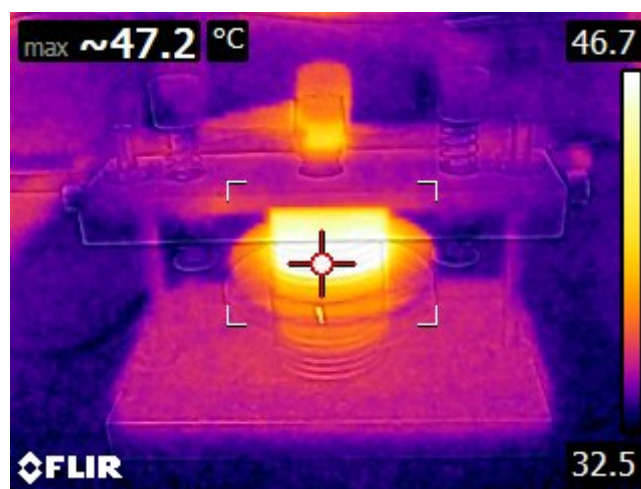

**Fig. S3** Infrared image about the reactor of the DBD plasma.

**Table S1** Molar ratios of Co, Fe, O, C and N in the samples determined by XPS

|                                                     | Co (wt.%) | Fe (wt.%) | O (wt.%) | C (wt.%) | N (wt.%) |
|-----------------------------------------------------|-----------|-----------|----------|----------|----------|
| Co <sub>x</sub> Fe <sub>y</sub> O <sub>4</sub> /C-D | 2.80      | 1.08      | 15.96    | 77.58    | 2.58     |
| Co <sub>x</sub> Fe <sub>y</sub> O <sub>4</sub> /C-C | 1.18      | 0.81      | 5.94     | 91.35    | 0.71     |
| Co <sub>x</sub> Fe <sub>y</sub> O <sub>4</sub> /C-P | 20.18     | 9.31      | 46.89    | 25.63    | 0.10     |

**Table S2** The ratio of different types of oxygen of catalysts in XPS spectra.

| Sample                                              | O1<br>(Lattice oxygen) | O2 (Defect-<br>oxygen) | O3 (Physically<br>adsorbed water/C-O) | O2 / O1            |
|-----------------------------------------------------|------------------------|------------------------|---------------------------------------|--------------------|
|                                                     | Peak area (%)          | Peak area (%)          | Peak area (%)                         | Peak area<br>ratio |
| Co <sub>x</sub> Fe <sub>y</sub> O <sub>4</sub> /C-D | 19.9                   | 39.9                   | 40.2                                  | 2.01               |
| Co <sub>x</sub> Fe <sub>y</sub> O <sub>4</sub> /C-C | 32.1                   | 42.2                   | 25.7                                  | 1.32               |
| Co <sub>x</sub> Fe <sub>y</sub> O <sub>4</sub> /C-P | 64.9                   | 22.1                   | 13.0                                  | 0.34               |

**Table S3** Ratios of Co<sup>3+</sup>/Co<sup>2+</sup> of as-obtained catalysts in Co 2p<sub>3/2</sub> peaks spectra

|                                                     | Species          | Location | Co <sup>3+</sup> /Co <sup>2+</sup> |
|-----------------------------------------------------|------------------|----------|------------------------------------|
| Co <sub>x</sub> Fe <sub>y</sub> O <sub>4</sub> /C-D | Co <sup>3+</sup> | 780.50   | 1.23                               |
|                                                     | Co <sup>2+</sup> | 782.57   |                                    |
| Co <sub>x</sub> Fe <sub>y</sub> O <sub>4</sub> /C-C | Co <sup>3+</sup> | 780.72   | 0.66                               |
|                                                     | Co <sup>2+</sup> | 782.25   |                                    |
| Co <sub>x</sub> Fe <sub>y</sub> O <sub>4</sub> /C-P | Co <sup>3+</sup> | 779.88   | 1.13                               |
|                                                     | Co <sup>2+</sup> | 781.30   |                                    |

**Table S4** Ratios of Fe<sup>3+</sup>/Fe<sup>2+</sup> of as-obtained catalysts in Fe 2p<sub>3/2</sub> spectra

|                                                     | Species          | Location | Fe <sup>3+</sup> /Fe <sup>2+</sup> |
|-----------------------------------------------------|------------------|----------|------------------------------------|
| Co <sub>x</sub> Fe <sub>y</sub> O <sub>4</sub> /C-D | Fe <sup>2+</sup> | 711.10   | 0.83                               |
|                                                     | Fe <sup>3+</sup> | 713.20   |                                    |
| Co <sub>x</sub> Fe <sub>y</sub> O <sub>4</sub> /C-C | Fe <sup>2+</sup> | 710.58   | 0.75                               |
|                                                     | Fe <sup>3+</sup> | 713.31   |                                    |
| Co <sub>x</sub> Fe <sub>y</sub> O <sub>4</sub> /C-P | Fe <sup>2+</sup> | 710.27   | 1.05                               |
|                                                     | Fe <sup>3+</sup> | 712.93   |                                    |

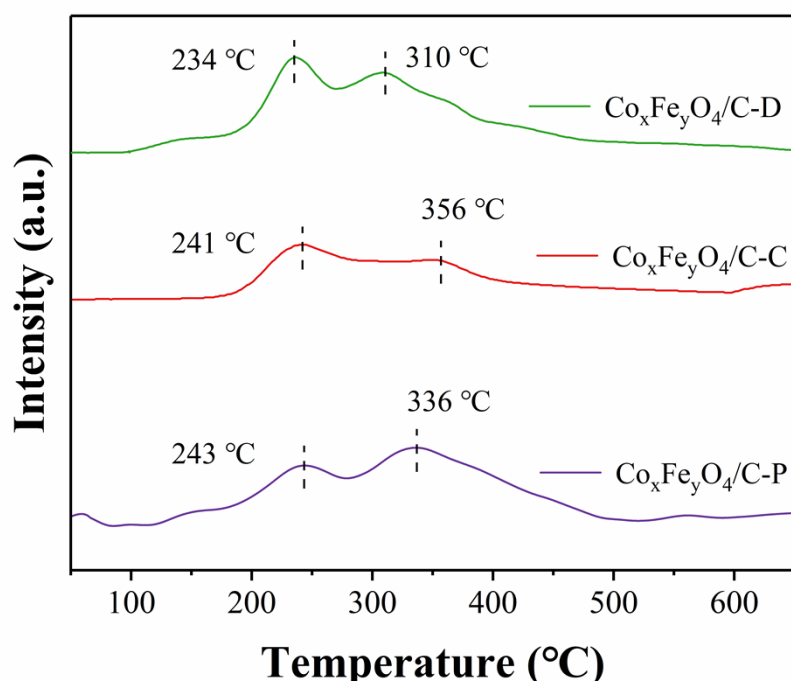

**Fig. S4** O<sub>2</sub>-TPD profiles of Co<sub>x</sub>Fe<sub>y</sub>O<sub>4</sub>/C-D, Co<sub>x</sub>Fe<sub>y</sub>O<sub>4</sub>/C-C and Co<sub>x</sub>Fe<sub>y</sub>O<sub>4</sub>/C-P.

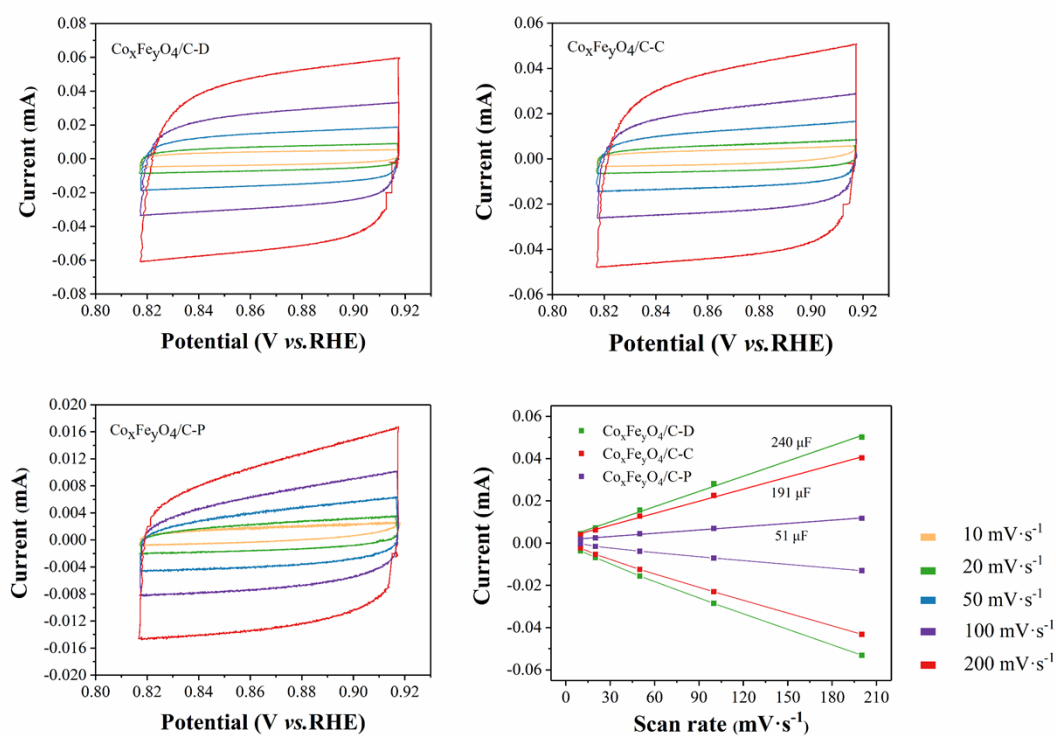

**Fig. S5** CV curves of a) Co<sub>x</sub>Fe<sub>y</sub>O<sub>4</sub>/C-D, b) Co<sub>x</sub>Fe<sub>y</sub>O<sub>4</sub>/C-C and c) Co<sub>x</sub>Fe<sub>y</sub>O<sub>4</sub>/C-P at different scan rates, d) The fitted currents against the scan rates of catalysts.

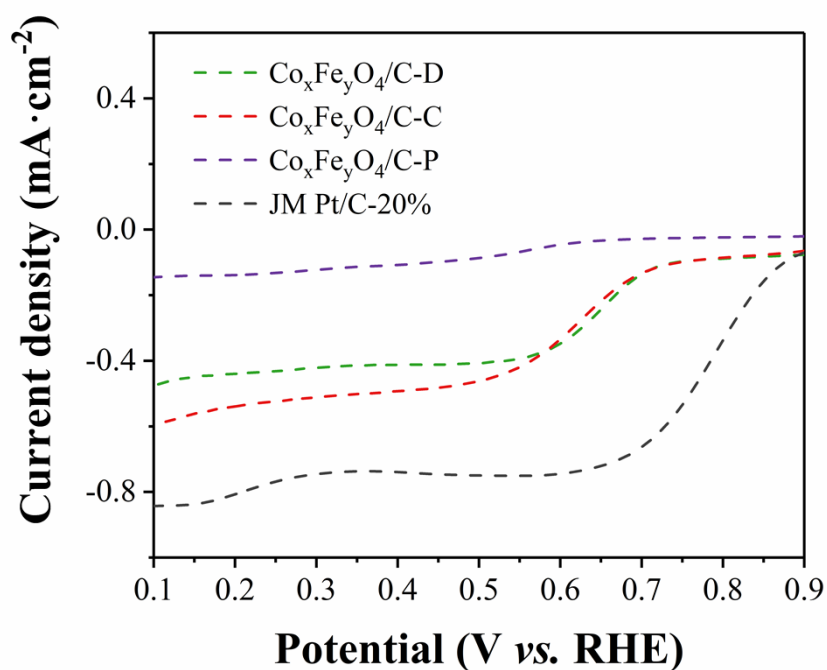

**Fig. S6** LSV at 1600 rpm in  $N_2$ -saturated 0.1 M KOH solution.

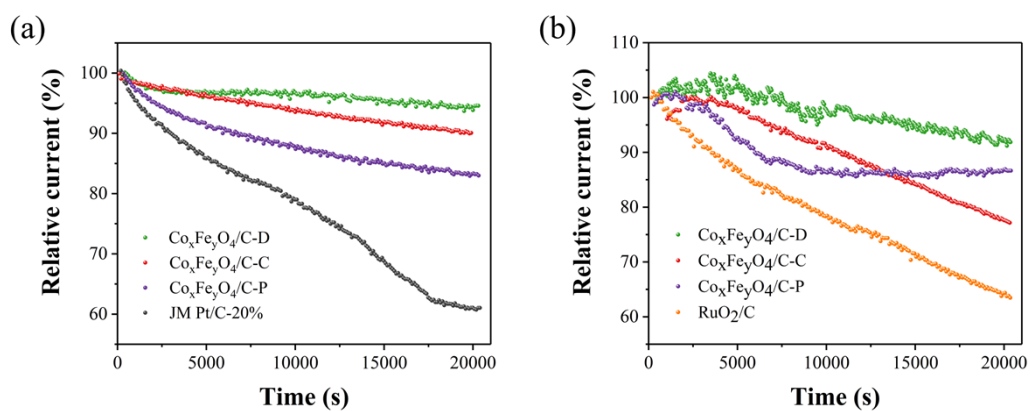

**Fig. S7** Relative current-time (i-t) chronoamperometric responses for (a) the ORR and (b) the OER on oxides  $Co_xFe_yO_4/C$  prepared by the cold plasma, calculation and coprecipitation methods and commercial Pt/C or  $RuO_2/C$  at a potential of -0.6 V (vs. Hg/HgO) for ORR and 0.75 V (vs. Hg/HgO) for OER in  $O_2$ -saturated 0.1 M KOH at a rotating speed of 1600 rpm.

**Table S5** The electronic conductivity at room temperature of the  $\text{Co}_x\text{Fe}_y\text{O}_4/\text{C-D}$ ,  $\text{Co}_x\text{Fe}_y\text{O}_4/\text{C-C}$  and  $\text{Co}_x\text{Fe}_y\text{O}_4/\text{C-P}$  samples.

|                                               | electrical resistivity<br>( $\Omega \cdot \text{cm}$ ) | electronic conductivity<br>( $\text{S} \cdot \text{cm}^{-1}$ ) |
|-----------------------------------------------|--------------------------------------------------------|----------------------------------------------------------------|
| $\text{Co}_x\text{Fe}_y\text{O}_4/\text{C-D}$ | 0.0926                                                 | 10.80                                                          |
| $\text{Co}_x\text{Fe}_y\text{O}_4/\text{C-C}$ | 0.2930                                                 | 3.41                                                           |
| $\text{Co}_x\text{Fe}_y\text{O}_4/\text{C-P}$ | 0.4518                                                 | 2.21                                                           |

**Table S6** Comparison of the synthesis methods of  $(\text{Co}, \text{Fe})_3\text{O}_4$  catalysts and their electrocatalytic performance.

| Catalysts                                                       | Preparation methods               | Temperature / Time                                                                                        | $E_{10}$ OER<br>(V vs. RHE) | $E_{1/2}$ ORR<br>(V vs. RHE) | $\Delta E$ (V)<br>$=E_{\text{OER}}-E_{\text{ORR}}$ | Ref.      |
|-----------------------------------------------------------------|-----------------------------------|-----------------------------------------------------------------------------------------------------------|-----------------------------|------------------------------|----------------------------------------------------|-----------|
| multiphase cobalt-iron spinel                                   | cold plasma method                | $\sim 50$ °C for 1h                                                                                       | 1.53                        | 0.64                         | 0.89                                               | this work |
| $\text{CoFe}_2\text{O}_4/\text{N/S}$ co-doped mesoporous carbon | hydrothermal                      | 180 °C for 3h                                                                                             | 1.7096                      | 0.7846                       | 0.925                                              | 12        |
| $\text{CoFe}_2\text{O}_4$ /carbon nanotube                      | solvothermal & calcination method | 180 °C for 12 h and annealed at 500 °C for 2 h                                                            | 1.620                       | 0.808                        | 0.812                                              | 13        |
| Co- and Fe-containing mixed oxides                              | vapor deposition                  | $\sim 520$ K for 5 min in an $\text{O}_2$ ( $6-8 \times 10^{-6}$ mbar) and $\sim 770$ K for 60 min in UHV | 1.550                       | 0.520                        | 1.030                                              | 14        |
| $\text{CoFe}_2\text{O}_4$ hexagonal nanoplates                  | hydrothermal & calcination method | 180 °C for 4 h and was calcinated in air at 300 °C for 3 h                                                | 1.620                       | 0.580                        | 1.040                                              | 15        |

**Table S6** Comparison of the synthesis methods of (Co, Fe)<sub>3</sub>O<sub>4</sub> catalysts and their electrocatalytic performance. (continued)

| Catalysts                                                                         | Preparation methods                            | Temperature / Time                                                                       | $E_{10}$ OER (V vs. RHE) | $E_{1/2}$ ORR (V vs. RHE) | $\Delta E$ (V) = $E_{\text{OER}} - E_{\text{ORR}}$ | Ref. |
|-----------------------------------------------------------------------------------|------------------------------------------------|------------------------------------------------------------------------------------------|--------------------------|---------------------------|----------------------------------------------------|------|
| (Co, Fe) <sub>3</sub> O <sub>4</sub> /N-CNT                                       | a mixing process and an impregnation technique | sonicate for 5 h; gas diffusion layer (GDL) substrates were annealed for 0.5 h at 300 °C | 1.5548                   | 0.6268                    | 0.928                                              | 16   |
| oxygen-vacancy-rich CoFe <sub>2</sub> O <sub>4</sub> anchored on cage-like carbon | solvothermal approach                          | 180 °C for 24 h                                                                          | 1.590                    | 0.765                     | 0.825                                              | 17   |
| Co <sub>x</sub> Fe <sub>3-x</sub> O <sub>4</sub> / acetylene black                | hydrothermal method                            | 200 °C for 20 h                                                                          | 1.7066                   | 0.5766                    | 1.13                                               | 18   |
| Co/CoFe <sub>2</sub> O <sub>4</sub> / N-doped graphene                            | solution-polymerization & pyrolysis            | pyrolysis at 800 °C in Ar for 3h                                                         | 1.630                    | 0.670                     | 0.960                                              | 19   |



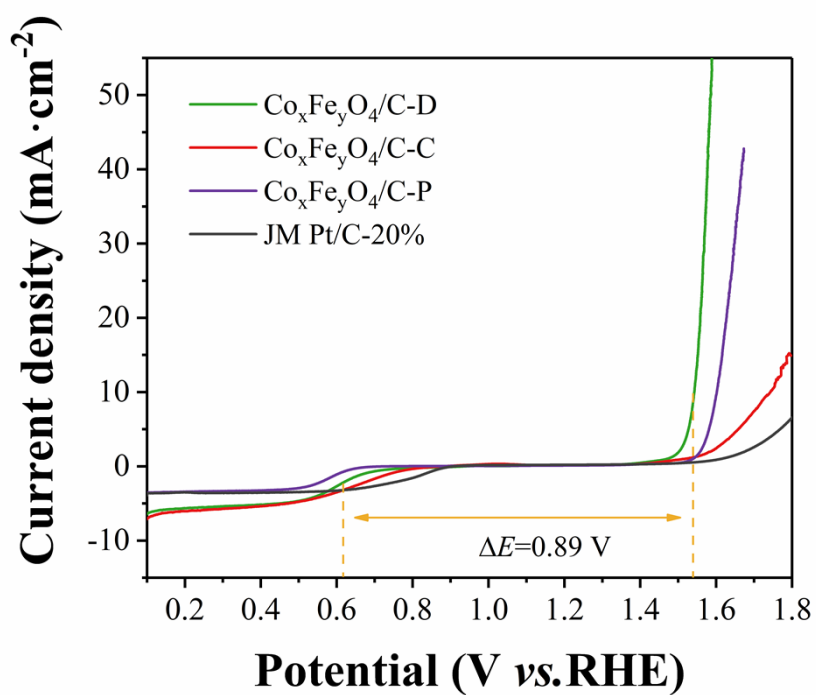

**Fig. S8** Overall polarization curves of Co<sub>x</sub>Fe<sub>y</sub>O<sub>4</sub>/C-D, Co<sub>x</sub>Fe<sub>y</sub>O<sub>4</sub>/C-C, Co<sub>x</sub>Fe<sub>y</sub>O<sub>4</sub>/C-P and the commercial Pt/C catalysts at 1600 rpm in O<sub>2</sub>-saturated 0.1 M KOH solution.

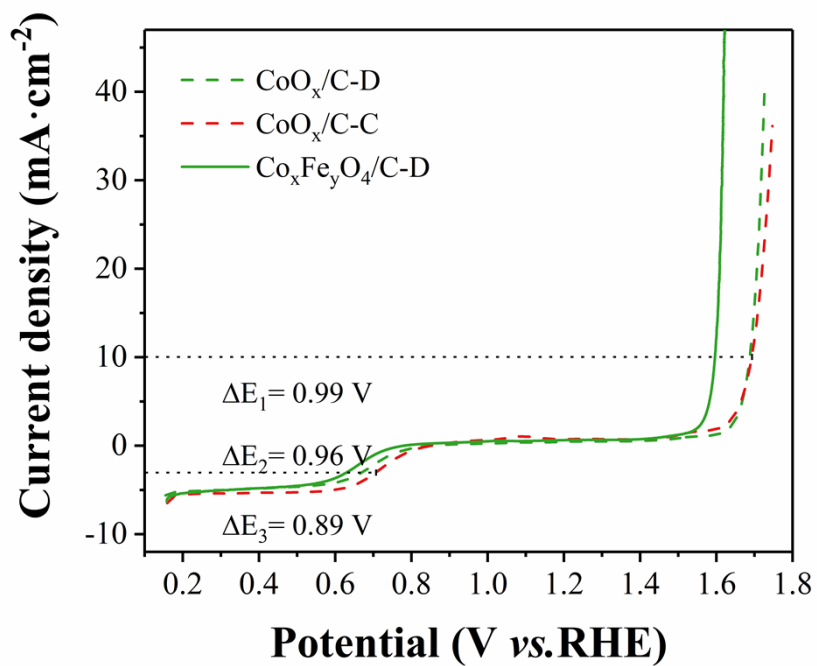

**Fig. S9** Overall polarization curves of CoO<sub>x</sub>/C-D, CoO<sub>x</sub>/C-C and Co<sub>x</sub>Fe<sub>y</sub>O<sub>4</sub>/C-D at 1600 rpm in O<sub>2</sub>-saturated 0.1 M KOH solution.
